# Supplementary material
Source: PubMed Central journal article supplement (PMC7659611)
Supplement: mmc1.pdf [file mmc1.pdf]

**Cell Reports Medicine, Volume 1**

**Supplemental Information**

**SARS-CoV-2-Specific T Cells Exhibit Phenotypic**

**Features of Helper Function, Lack of Terminal**

**Differentiation, and High Proliferation Potential**

**Jason Neidleman, Xiaoyu Luo, Julie Frouard, Guorui Xie, Gurjot Gill, Ellen S. Stein, Matthew McGregor, Tongcui Ma, Ashley F. George, Astrid Kusters, Warner C. Greene, Joshua Vasquez, Eliver Ghosn, Sulggi Lee, and Nadia R. Roan**

## SUPPLEMENTAL INFORMATION

Figure S1

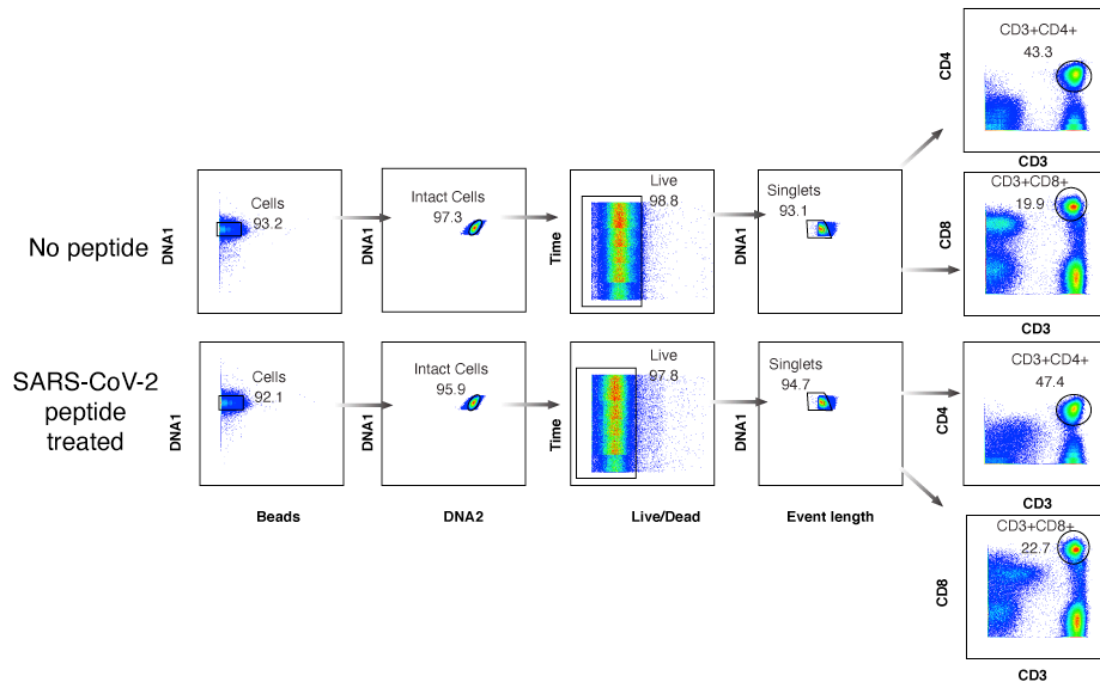

**Figure S1. CyTOF gating strategy to identify CD4+ and CD8+ T cells from convalescent COVID-19 patients – Related to Figure 1.** PBMCs were purified from freshly drawn blood specimens, treated as indicated in Fig. 1, and phenotyped by CyTOF. Shown is an example of the gating strategy leading to the identification of live, singlet CD4+ and CD8+ T cells.

Figure S2

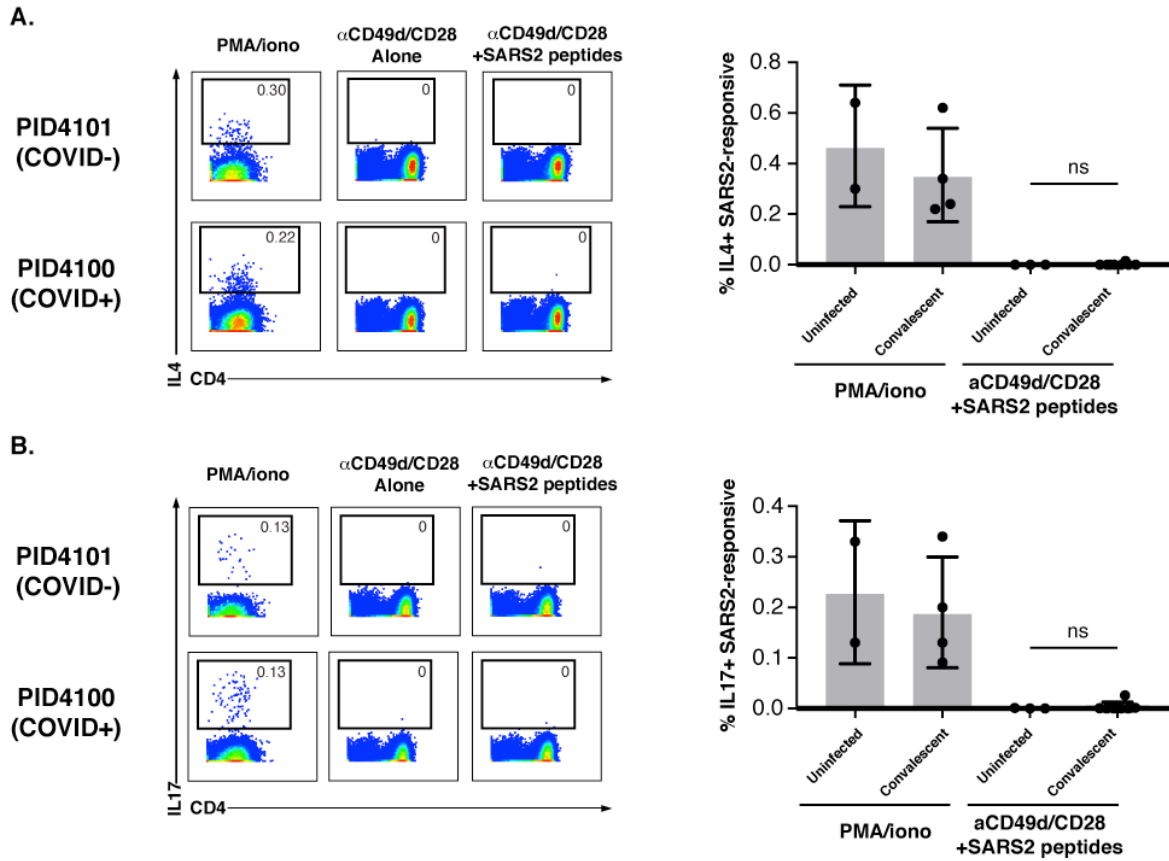

**Figure S2. Blood from convalescent individuals lack SARS-CoV-2 spike-specific CD4<sup>+</sup> T cells producing IL4 or IL17 – Related to Figure 1.** Shown on the left are pseudocolor plots of CyTOF datasets reflecting the percentage of CD4<sup>+</sup> T cells producing IL4 (A) or IL17 (B) in response to the indicated treatment condition, for one representative uninfected (COVID-) and one convalescent (COVID+) donor. Numbers correspond to the percentage of cells within the gates. PMA/ionomycin stimulation was used to demonstrate the presence of IL4- and IL17-producing T cells in these donors. Anti-CD49d/CD28 was used to provide co-stimulation during peptide treatment. Shown on the right are cumulative data of three uninfected individuals and nine convalescent individuals (Table S2). Results are gated on live, singlet CD4<sup>+</sup> T cells. n.s. = non-significant as assessed using the Student's unpaired t test.

Figure S3

**A. CD4+ T cells (PID 4100)**

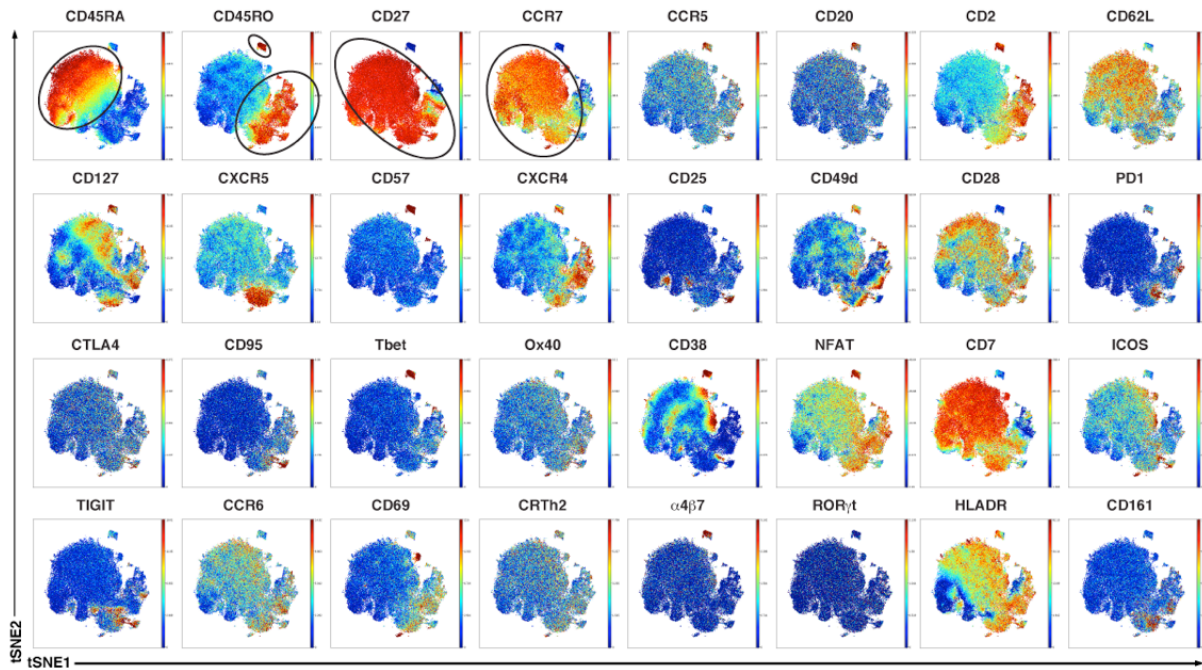

**B. CD8+ T cells (PID 4100)**

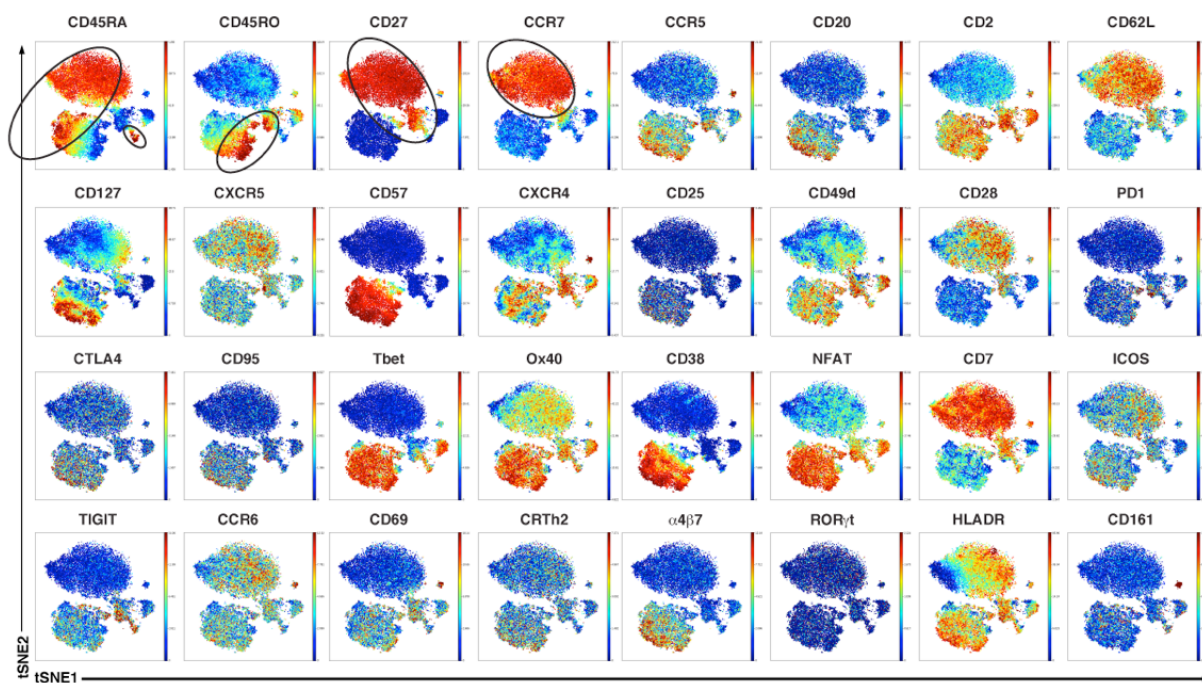

**Figure S3. Heatmaps of antigen expression in T cells from representative donor – Related to Figure 2.** Shown

are t-SNE plots of CyTOF datasets reflecting CD4+ (A) and CD8+ (B) T cells from representative convalescent

donor PID4100. Regions of the t-SNE harboring SARS-CoV-2- and CMV-specific T cells are shown in Fig. 2.

Circled in the first four plots are regions with high expression levels of CD45RA (expressed on naïve/Tscm/Temra T cells), CD45RO (expressed on memory T cells), and CD27 and CCR7 (expressed on naïve and Tcm cells).

Figure S4

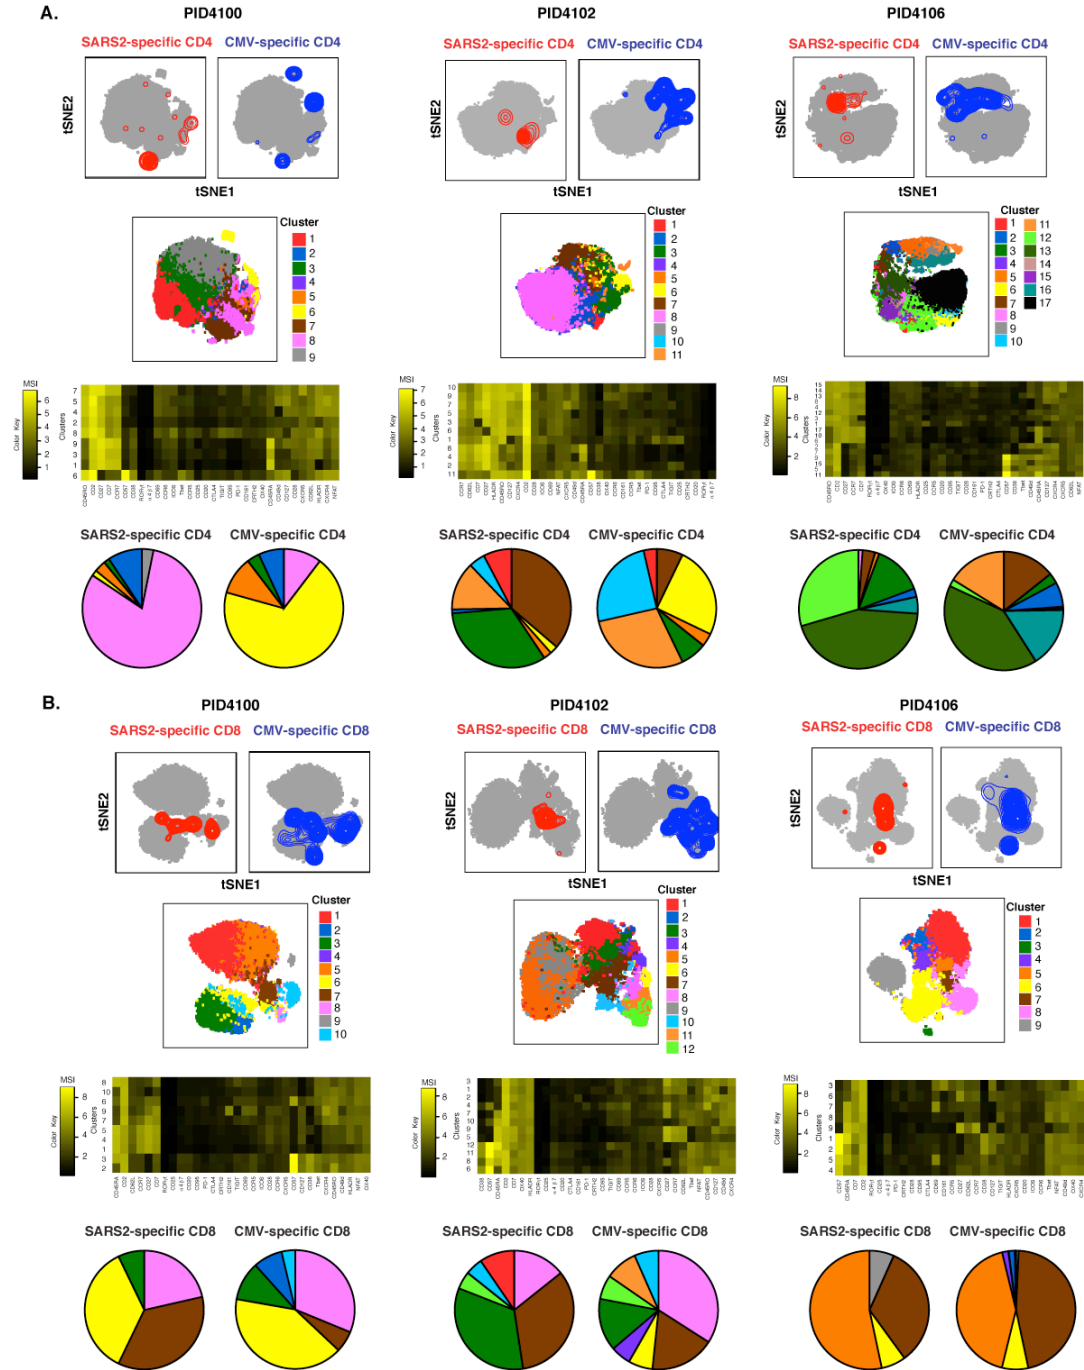

**Figure S4. SARS-CoV-2 spike-specific T cells recognizing SARS-CoV-2 differ in phenotypes from those recognizing CMV – Related to Figure 2.** Shown are t-SNE plots of CyTOF datasets reflecting CD4+ (A) or CD8+ (B) T cells from three CMV+ COVID-19 convalescent donors. The top pairs of plots are identical to the contour plots presented in [Fig. 2](#) and serve as references for where in the t-SNE the SARS-CoV-2-specific and CMV-specific T cells are concentrated. The middle plots depict the same t-SNE colored by DensVM clusters. Shown underneath the clustered t-SNE plots are heatmaps showing relative expression levels (in mean signal intensity, or MSI) for each of the indicated antigens, hierarchically clustered based on Euclidean distances. The pie graphs at the bottom depict the proportions of SARS-CoV-2-specific or CMV-specific T cells that belong to each cluster. Note that each pair of pie graphs differs, with more pronounced differences observed among the CD4+ T cells.

Figure S5

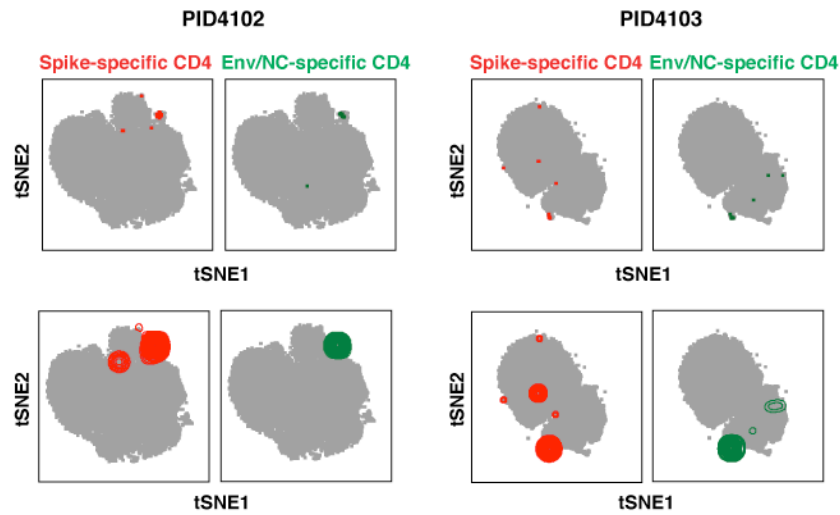

**Figure S5. Antigen-specific CD4+ T cells against SARS-CoV-2 spike, envelope (env), and nucleocapsid (NC) are phenotypically similar – Related to Figure 2.** Shown are t-SNE plots of CyTOF datasets reflecting CD4+ T cells from two COVID-19 convalescent individuals. Cells shown in grey correspond to CD4+ T cells from specimens stimulated with anti-CD49d/CD28 in the absence of any peptides. The top pairs of plots show SARS-CoV-2 spike-specific (*red*) or env/NC-specific (*green*) cells as individual dots. The bottom pairs of plots show the same data but with the antigen-specific cells shown as contours instead of dots, to better visualize regions with highest densities of antigen-specific cells. Note that the highest densities of antigen-specific cells reside in similar regions of the t-SNE, suggesting that CD4+ T cells recognizing spike, env, and NC are phenotypically similar.

Figure S6

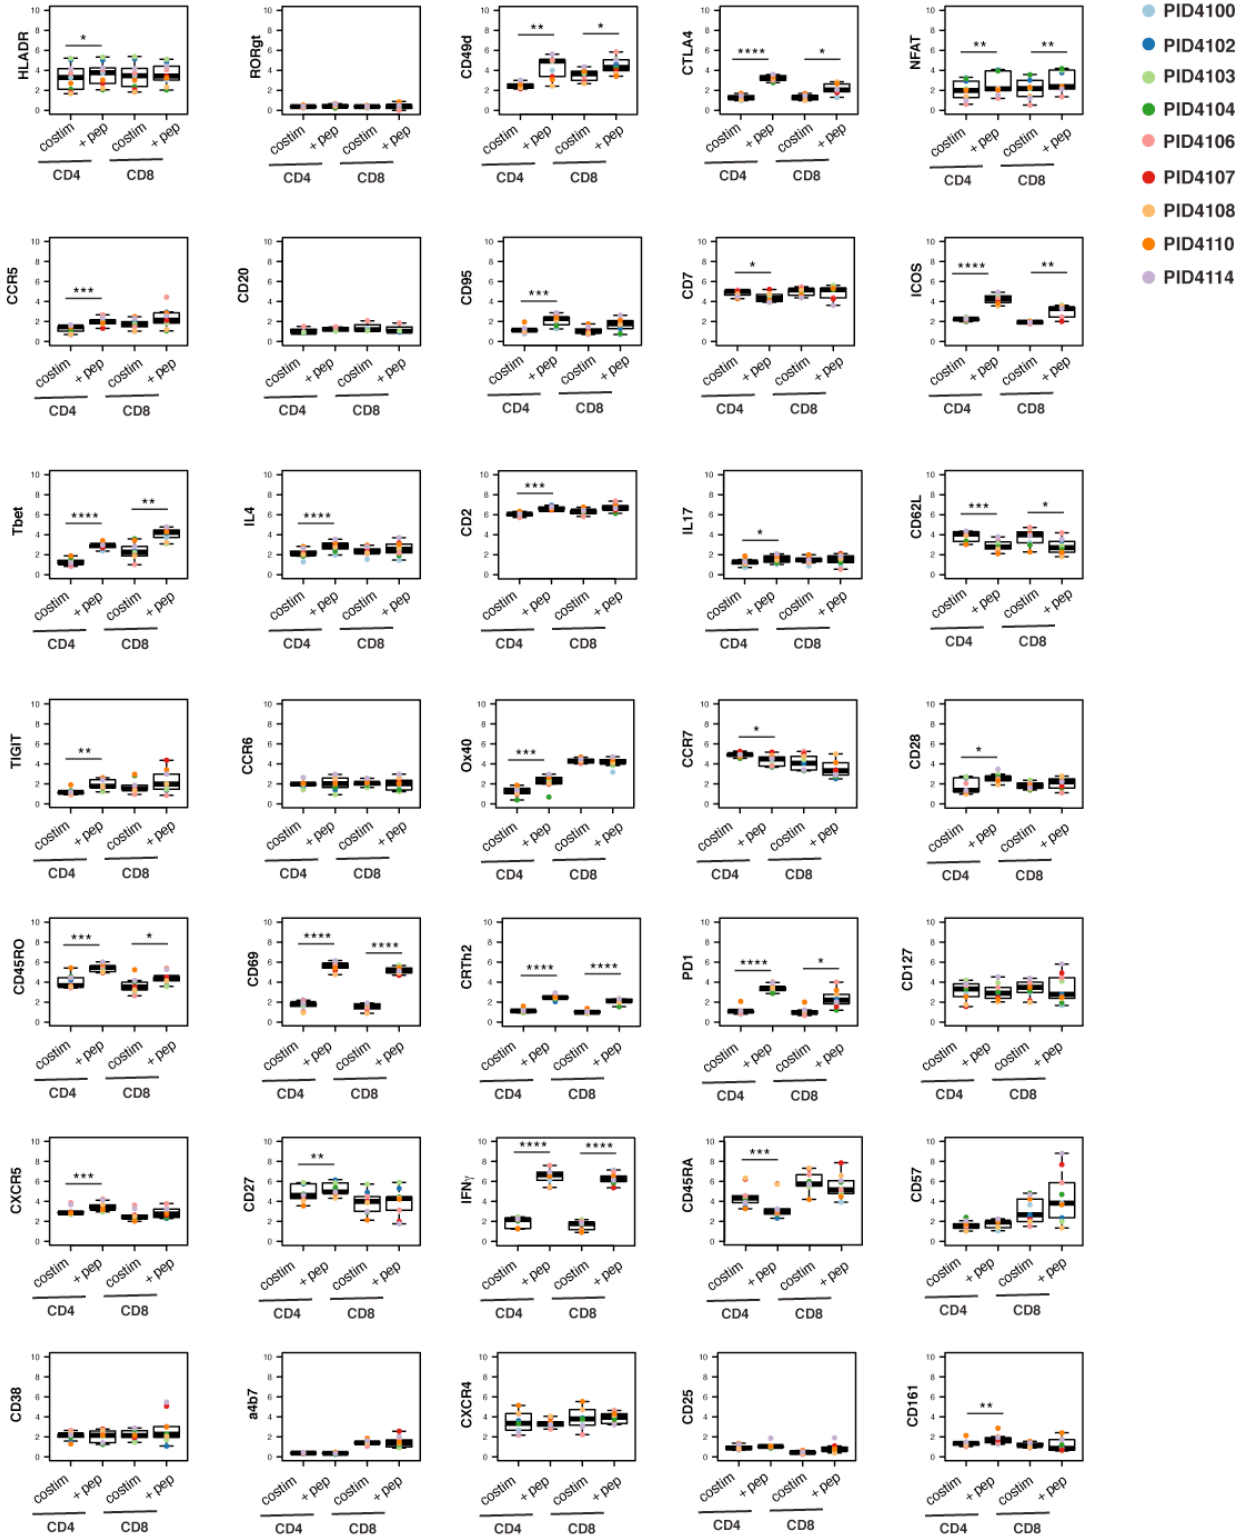



**Figure S6. Mean expression levels of 35 surface and intracellular antigens in CD4+ and CD8+ T cells from 9 convalescent individuals who had recovered from mild COVID-19 – Related to Figure 2.** PBMCs were purified from freshly drawn blood specimens, treated with anti-CD49d/CD28 for 6 hours alone (“costim”), or in the additional presence of overlapping 15-mer peptides against SARS-CoV-2 spike (“+ pep”), and then phenotyped by CyTOF. Results are gated on live, singlet CD4+/CD8+ T cells for the “costim” conditions, and live, singlet CD4+/CD8+ T cells expressing IFN $\gamma$  for the “+ pep” conditions. Shown are the mean signal intensity (MSI) values for arcsinh-transformed data. \* $p < 0.05$ , \*\* $p < 0.01$  as assessed using the Student’s paired t test and adjusted for multiple testing using the Benjamini-Hochberg for FDR.

Figure S7

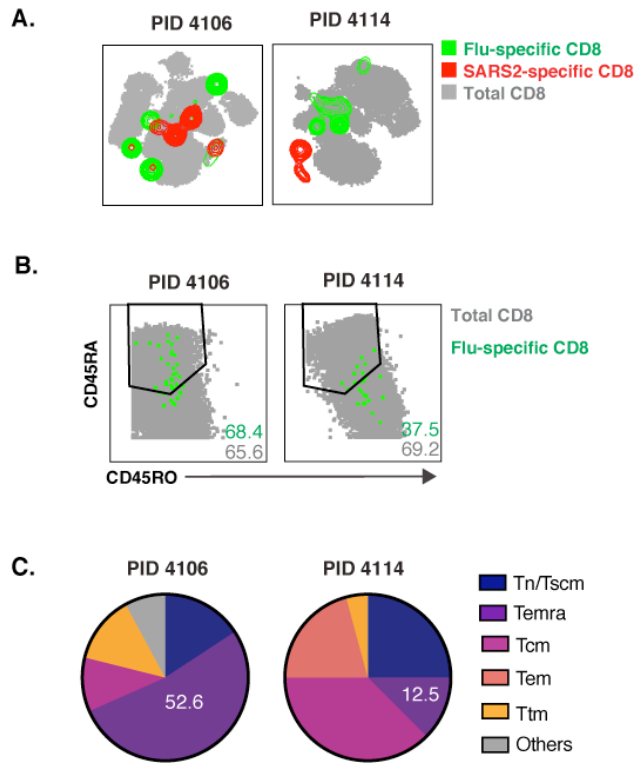

**Figure S7. Flu-specific CD8<sup>+</sup> T cells in convalescent individuals are phenotypically distinct from SARS-CoV-2-specific CD8<sup>+</sup> T cells – Related to Figure 5.** **A)** Shown are t-SNE plots of CyTOF datasets reflecting CD8<sup>+</sup> T cells from two COVID-19 convalescent donors who harbored flu-specific CD8<sup>+</sup> T cell responses. Cells shown in grey correspond to CD8<sup>+</sup> T cells from specimens stimulated with anti-CD49d/CD28 in the absence of any peptides. Flu- and SARS-CoV-2-specific CD8<sup>+</sup> T cells shown as green and red contours, respectively. **B)** Flu-specific CD8<sup>+</sup> T cells include both CD45RA<sup>+</sup>CD45RO<sup>-</sup> and CD45RA<sup>-</sup>CD45RO<sup>+</sup> cells. The phenotypes of total (*grey*) or flu-specific (*green*) CD8<sup>+</sup> T cells are shown as dot plots for two COVID-19 convalescent donors for which flu-specific responses were detected. **C)** Temra cells can comprise a majority or minority of the flu-specific CD8<sup>+</sup> T cell response. The proportions of flu-specific CD8<sup>+</sup> T cells belonging to each subset are depicted as pie graphs. Numbers correspond to the percentages of cells belonging to the Temra subset.

**Table S1: Participant Characteristics – Related to STAR Methods.**

| <u>Patient ID</u> | <u>Gender</u> | <u>Age</u> | <u>SARS-CoV-2 Status</u> | <u>CMV status</u> | <u>Date of symptom onset</u> | <u>Date of PCR+ test</u> | <u>Date of blood draw(s)</u>   | <u>Time between PCR+ test and analysis</u> |
|-------------------|---------------|------------|--------------------------|-------------------|------------------------------|--------------------------|--------------------------------|--------------------------------------------|
| PID4100           | Female        | 28         | Infected                 | Positive          | 3/17/20                      | 3/19/20                  | 4/24/20                        | 36 days                                    |
| PID4102           | Male          | 46         | Infected                 | Positive          | 3/11/20                      | 3/13/20                  | 4/29/20<br>5/6/20*<br>5/20/20* | 47 days,<br>54 days*<br>69 days*           |
| PID4103           | Female        | 41         | Infected                 | Negative          | 3/13/20                      | 4/9/20                   | 4/29/20<br>5/6/20*<br>5/20/20* | 20 days,<br>27 days*<br>41 days*           |
| PID4104           | Female        | 33         | Infected                 | Negative          | 3/11/20                      | 3/14/20                  | 5/13/20                        | 60 days                                    |
| PID4106           | Female        | 67         | Infected                 | Positive          | 3/6/20                       | 3/26/20                  | 5/4/20                         | 39 days                                    |
| PID4114           | Female        | 45         | Infected                 | Positive          | 4/15/20                      | 4/17/20                  | 6/15/20                        | 59 days                                    |
| PID4107           | Female        | 38         | Infected                 | Positive          | 3/25/20                      | 4/1/20                   | 5/13/20                        | 42 days                                    |
| PID4108           | Female        | 18         | Infected                 | Positive          | 3/16/20                      | NA                       | 5/13/20                        | NA                                         |
| PID4110           | Male          | 57         | Infected                 | Positive          | 4/19/20                      | 4/24/20                  | 5/15/20                        | 21 days                                    |
| PID4101           | Female        | 42         | Uninfected               | Positive          | NA                           | NA                       | 4/24/20                        | NA                                         |
| PID4105           | Male          | 57         | Uninfected               | Negative          | NA                           | NA                       | 5/4/20                         | NA                                         |
| PID4109           | Male          | 30         | Uninfected               | Negative          | NA                           | NA                       | 5/13/20                        | NA                                         |

\*Used in longitudinal analysis

**Table S2: List of CyTOF antibodies used in study – Related to STAR Methods.** Antibodies were either purchased from the indicated vendor or prepared in-house using commercially available MaxPAR conjugation kits per manufacturer’s instructions (Fluidigm).

| <b>Antigen Target</b> | <b>Clone</b> | <b>Elemental Isotope</b> | <b>Vendor</b> |
|-----------------------|--------------|--------------------------|---------------|
| HLADR                 | TÜ36         | Qdot (112Cd)             | Thermofisher  |
| ROR $\gamma$ t*       | AFKJS-9      | 115 In                   | In-house      |
| CD49d ( $\alpha$ 4)   | 9F10         | 141Pr                    | Fluidigm      |
| CTLA4*                | 14D3         | 142Nd                    | In-house      |
| NFAT*                 | D43B1        | 143Nd                    | Fluidigm      |
| CCR5                  | NP6G4        | 144Nd                    | Fluidigm      |
| CD20                  | 2H7          | 145Nd                    | In-house      |
| CD95                  | BX2          | 146Nd                    | In-house      |
| CD7                   | CD76B7       | 147Sm                    | Fluidigm      |
| ICOS                  | C398.4A      | 148Nd                    | Fluidigm      |
| Tbet*                 | 4B10         | 149Sm                    | In-house      |
| IL4*                  | MP4-25D2     | 150Nd                    | In-house      |
| CD2                   | TS1/8        | 151Eu                    | Fluidigm      |
| IL17*                 | BL168        | 152Sm                    | In-house      |
| CD62L                 | DREG56       | 153Eu                    | Fluidigm      |
| TIGIT                 | MBSA43       | 154Sm                    | Fluidigm      |
| CCR6                  | 11A9         | 155Gd                    | In-house      |
| IL6*                  | MQ2-13A5     | 156 Gd                   | In-house      |
| CD8                   | RPA-T8       | 157Gd                    | In-house      |
| CD19                  | HIB19        | 157Gd                    | In-house      |
| CD14                  | M5E2         | 157Gd                    | In-house      |
| OX40                  | ACT35        | 158Gd                    | Fluidigm      |
| CCR7                  | G043H7       | 159Tb                    | Fluidigm      |
| CD28                  | CD28.2       | 160Gd                    | Fluidigm      |
| CD45RO                | UCHL1        | 161Dy                    | In-house      |
| CD69                  | FN50         | 162Dy                    | Fluidigm      |
| CRTH2                 | BM16         | 163Dy                    | Fluidigm      |
| PD-1                  | EH12.1       | 164Dy                    | In-house      |
| CD127                 | A019D5       | 165Ho                    | Fluidigm      |
| CXCR5                 | RF8B2        | 166Er                    | In-house      |
| CD27                  | L128         | 167Er                    | Fluidigm      |
| IFN $\gamma$ *        | B27          | 168Er                    | Fluidigm      |
| CD45RA                | HI100        | 169Tm                    | Fluidigm      |
| CD3                   | UCHT1        | 170Er                    | Fluidigm      |
| CD57                  | HNK-1        | 171Yb                    | In-house      |
| CD38                  | HIT2         | 172Yb                    | Fluidigm      |
| $\alpha$ 4 $\beta$ 7  | Act1         | 173Yb                    | In-house      |
| CD4                   | SK3          | 174Yb                    | Fluidigm      |
| CXCR4                 | 12G5         | 175Lu                    | Fluidigm      |
| CD25                  | M-A251       | 176Yb                    | In-house      |
| CD161                 | NKR-P1A      | 209 Bi                   | In-house      |

\*Intracellular antibodies

**Table S3: Frequencies of SARS-CoV-2- and CMV-specific T cells in convalescent individuals – Related to Figure 1.**

| Patient ID | SARS2 CD4* | SARS2 CD8 <sup>#</sup> | CMV CD4* | CMV CD8 <sup>#</sup> |
|------------|------------|------------------------|----------|----------------------|
| PID4100    | 0.067      | 0.05                   | 0.36     | 0.66                 |
| PID4102    | 0.28       | 0.21                   | 0.061    | 0.47                 |
| PID4103    | 0.054      | 0.038                  | 0        | 0                    |
| PID4104    | 0.068      | 0.009                  | 0        | 0                    |
| PID4106    | 0.14       | 0.07                   | 0.18     | 6.9                  |
| PID4107    | 0.030      | 0.14                   | 0.016    | 0.049                |
| PID4108    | 0.029      | 0.015                  | 0.026    | 0.027                |
| PID4110    | 0.14       | 0.026                  | 0.048    | 0.0052               |
| PID4114    | 0.076      | 0.010                  | 0.13     | 0.037                |

\* Reported as frequency of live, singlet CD4+ T cells

# Reported as frequency of live, singlet CD8+ T cells
